# Supplementary material for: Low molecular weight species of TDP-43 generated by abnormal splicing form inclusions in amyotrophic lateral sclerosis and result in motor neuron death
Source: Springer Nature journal article supplement (doi:10.1007/s00401-015-1412-5), 2015-03-18
Supplement: MOESM1 [file 8404828]

Low molecular weight species of TDP-43 generated by abnormal splicing

Shangxi Xiao, Teresa Sanelli, Helen Chiang, Yulong Sun, Avijit Chakrabarty, Julia Keith, Ekaterina Rogueva, Lorne Zinman and Janice Robertson<sup>1</sup>

<sup>1</sup> Corresponding author: [jan.robertson@utoronto.ca](mailto:jan.robertson@utoronto.ca), Tanz Centre For Research in Neurodegenerative Diseases, Department of Laboratory Medicine and Pathobiology, University of Toronto, Toronto, ON, Canada, M5T 2S8

Electronic Supplementary Material 1

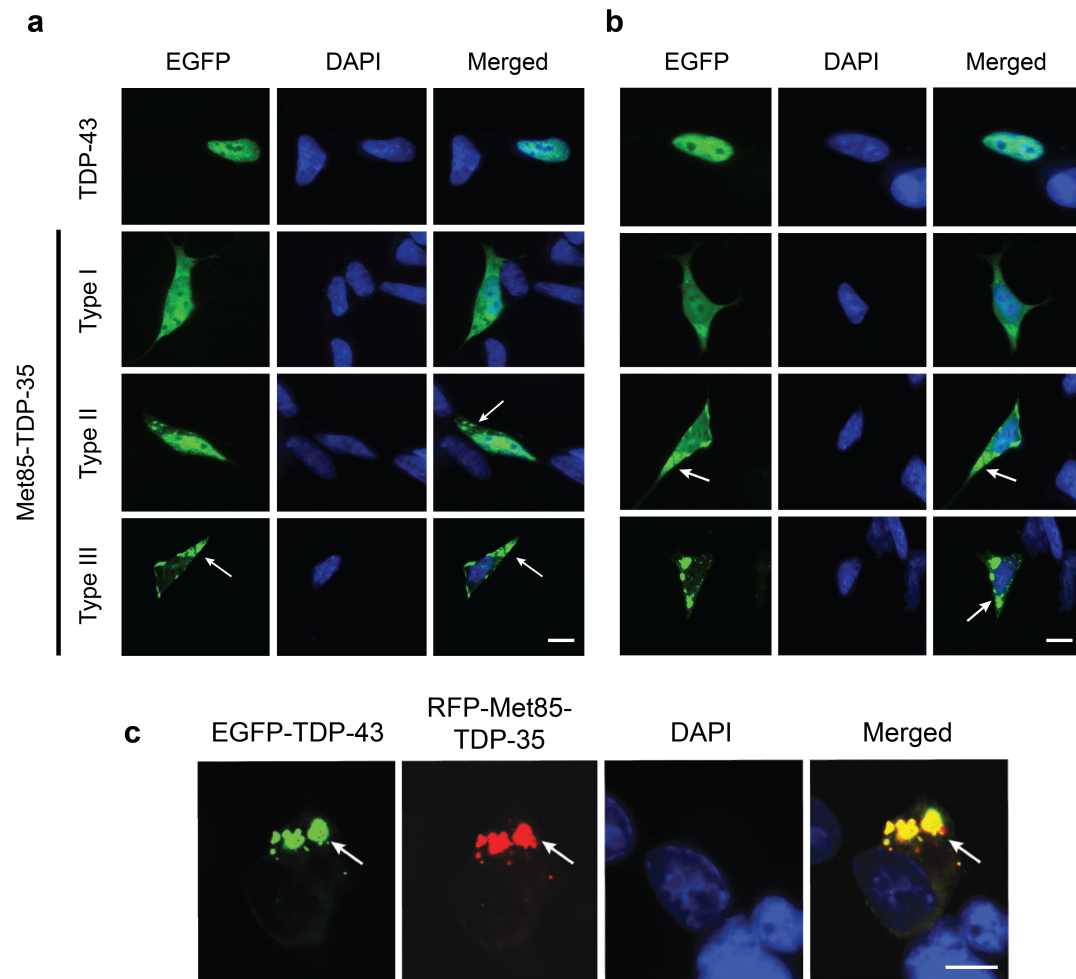

**Fig. S1** Expression pattern of full-length TDP-43 and Met<sup>85</sup>-TDP-35 in transfected SH-SY5Y cells. C-terminally tagged (a) and N-terminally tagged (b) EGFP-TDP-43 and EGFP-Met<sup>85</sup>-TDP-35 demonstrated different subcellular localizations, with TDP-43 in the nucleus and Met<sup>85</sup>-TDP-35 exhibiting three types of expression patterns. In type I, Met<sup>85</sup>-TDP-35 was diffuse throughout the whole cell (including both nucleus and cytoplasm); in type II, Met<sup>85</sup>-TDP-35 was diffuse throughout the whole cell but also formed cytoplasmic aggregates (arrow); and in type III, Met<sup>85</sup>-TDP-35 formed large cytoplasmic aggregates (arrow) and was absent from the nucleus. (c) In SH-SY5Y cells co-expressing EGFP-TDP-43 and RFP-Met<sup>85</sup>-TDP-35, TDP-43 redistributed from the nucleus to the cytoplasm and colocalized to the same inclusion bodies (arrow) as Met<sup>85</sup>-TDP-35. Scale bars = 10 μm
