# Supplementary material for: Low molecular weight species of TDP-43 generated by abnormal splicing form inclusions in amyotrophic lateral sclerosis and result in motor neuron death
Source: Springer Nature journal article supplement (doi:10.1007/s00401-015-1412-5), 2015-03-18
Supplement: MOESM2 [file 8404828]

# Acta Neuropathologica

## Low molecular weight species of TDP-43 generated by abnormal splicing

Shangxi Xiao, Teresa Sanelli, Helen Chiang, Yulong Sun, Avijit Chakrabarty, Julia Keith, Ekaterina Rogueva, Lorne Zinman and Janice Robertson<sup>1</sup>

<sup>1</sup> Corresponding author: [jan.robertson@utoronto.ca](mailto:jan.robertson@utoronto.ca), Tanz Centre For Research in Neurodegenerative Diseases, Department of Laboratory Medicine and Pathobiology, University of Toronto, Toronto, ON, Canada, M5T 2S8

### Electronic Supplementary Material 2

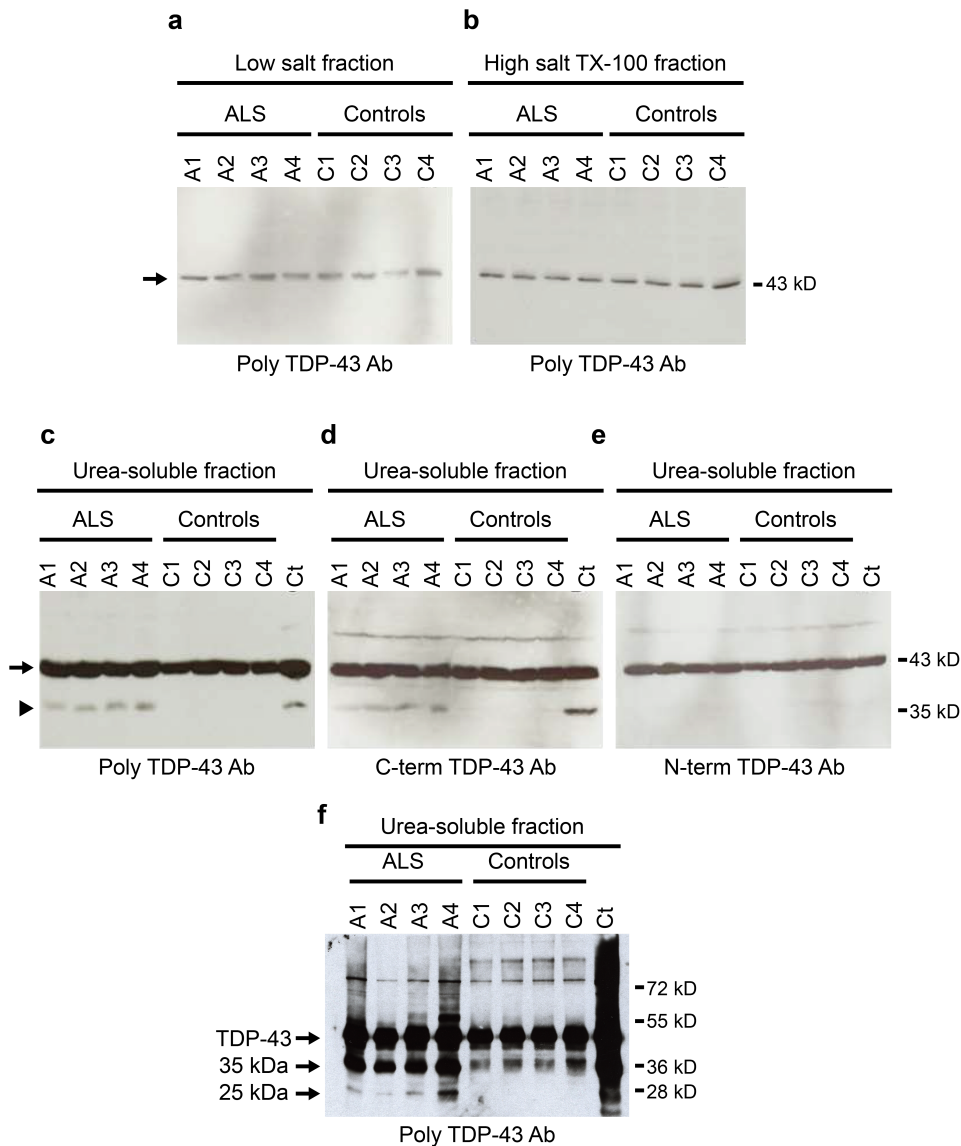

**Fig. S2** Biochemical analysis of TDP-43 in spinal cord extracts of ALS and control cases. Immunoblotting equivalent amounts of (a) low salt (b) high salt Triton X-100 and urea-soluble fractions using polyclonal TDP-43 antibody (c) showed that full-length TDP-43 (arrow) was present in all fractions. A distinct 35 kDa species (arrowhead) was noticeable only in the urea-soluble fraction (c) and was present only in ALS samples and not in controls. This 35 kDa species exhibited similar MW as Met<sup>85</sup>-TDP-35 (Ct = control) and was immunolabeled with C-terminal TDP-43 antibody (d) and not N-terminal TDP-43 antibody (e). The 25 kDa species was apparent only during long exposure (f). Cases A1 and A4 also carry *C9orf72* expansions
